# Supplementary material for: Humidity-responsive actuators from integrating liquid crystal networks in an orienting scaffold
Source: Royal Society of Chemistry journal article supplement (doi:10.1039/c7sm01505d), 2017-01-01
Supplement: c7sm01505d1.pdf [file c7sm01505d1.pdf]

## ELECTRONIC SUPPLEMENTARY INFORMATION

# Humidity-responsive actuators from integrating liquid crystal networks in an orienting scaffold

Alexander Ryabchun\*, Federico Lancia, Anne-Déborah Nguindjel, Nathalie Katsonis\*

*Bio-inspired and Smart Materials, MESA+ Institute for Nanotechnology, University of Twente,  
PO Box 207, 7500 AE Enschede, The Netherlands*

\*E-mails: N.H.Katsonis@utwente.nl (Prof. N. Katsonis), a.ryabchun@utwente.nl (Dr. A. Ryabchun)

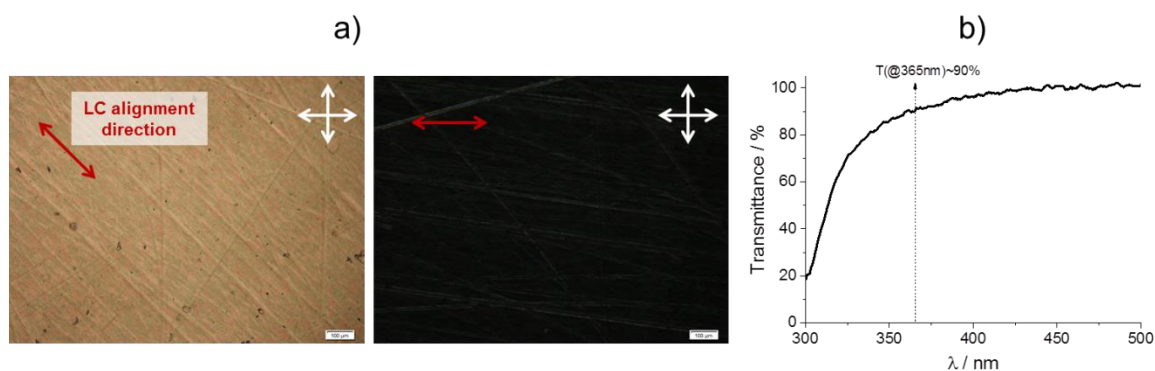

**Figure S1.** a) Polarized optical images and b) transmittance spectrum of the reinforced liquid crystal network. Crossed white arrows correspond to polarizer and analyzer.

**Table S1.** Mechanical characterization of the anisotropic materials involved in the study in direction perpendicular to liquid crystal alignment.

|                                          | <b>E (GPa)</b> | <b><math>\epsilon_b</math> (%)</b> | <b><math>U_T</math>(MJm<sup>-3</sup>)</b> |
|------------------------------------------|----------------|------------------------------------|-------------------------------------------|
| <b>Liquid crystal network</b>            | 1.22           | 9                                  | 3.52                                      |
| <b>Porous polypropylene</b>              | 0.28           | 137                                | 13.46                                     |
| <b>Reinforced liquid crystal network</b> | 0.70           | 2                                  | 0.15                                      |

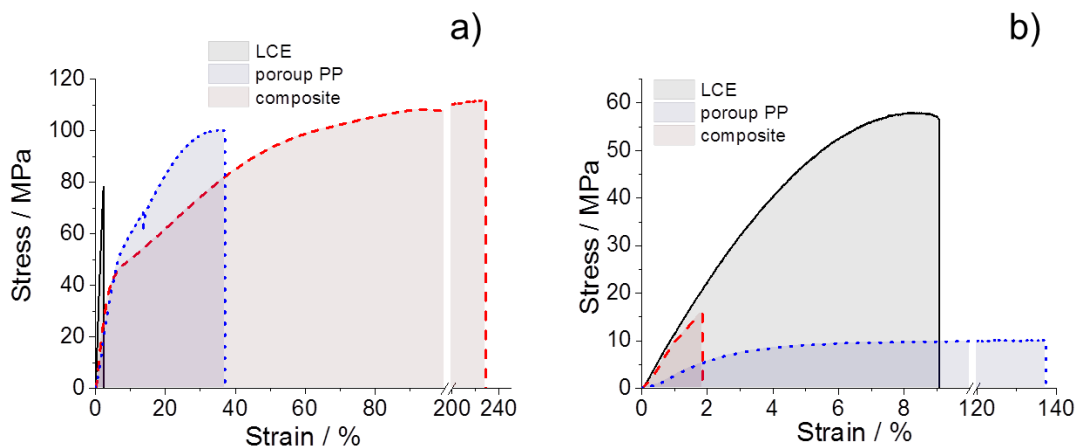

**Figure S2.** Tensile curves of the materials involved in the study measured in direction a) parallel and b) perpendicular to liquid crystal alignment. Slope of the tensile curve corresponds to elastic modulus and area under the curve is ultimate toughness.

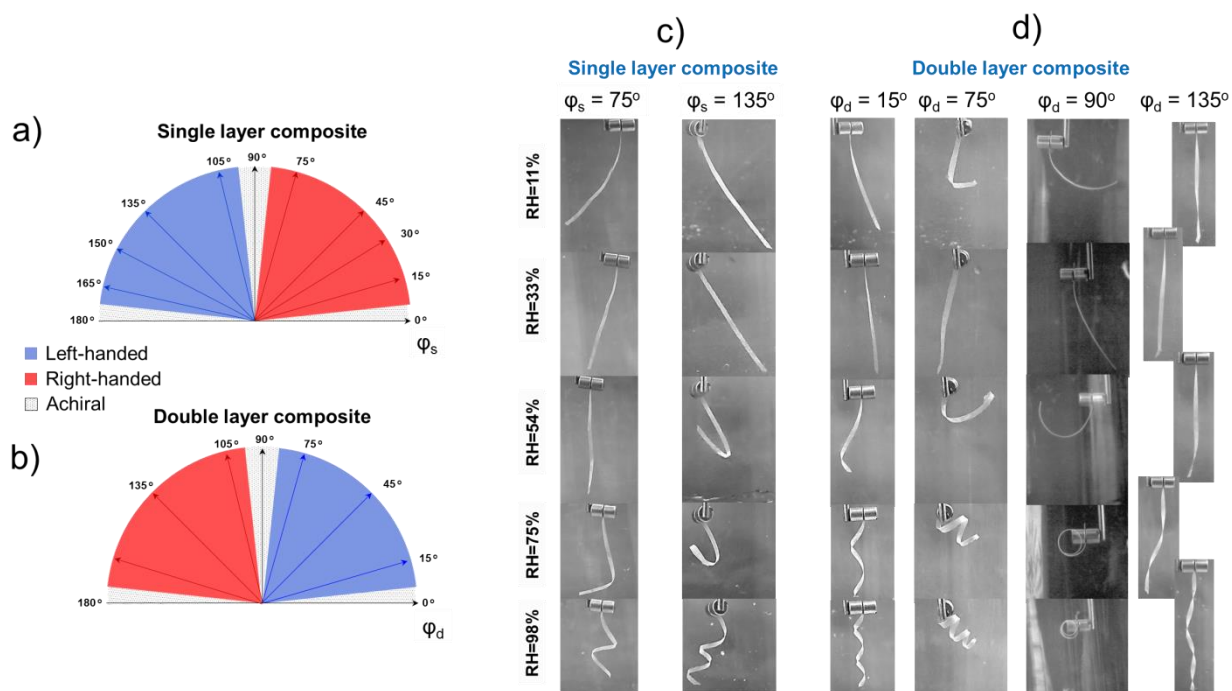

**Figure S3.** Summarized diagram of the shapes of a) single and b) double layered composite ribbons at 98% humidity. Humidity-induced shape changes of c) single and d) double layered composite

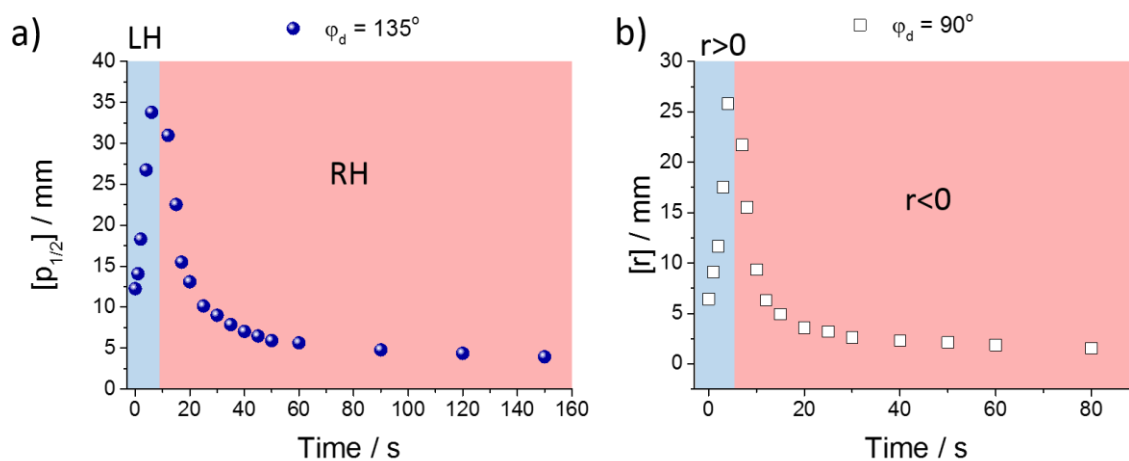

**Figure S4.** Time evolution of geometrical parameters (irrespective to sign of curvature/handedness) of double layer ribbon cut at (a) 135° and (b) 90° after rapid change of environmental humidity from 11% to 98%. LH and RH corresponds to left- and right-handed shape.

**Video S1.** Real time actuation of the single layer composite ribbon cut at  $135^\circ$  upon changing humidity from 11% to 98%.

**Video S2.** Real time actuations of the double layer composite ribbons cut at  $135^\circ$  and  $75^\circ$  upon changing humidity from 11% to 98%.
